# Supplementary material for: Anisotropic crystal orientations dependent mechanical properties and fracture mechanisms in zinc blende ZnTe nanowires
Source: Royal Society of Chemistry journal article supplement (doi:10.1039/d3ra03825d), 2023-01-01
Supplement: d3ra03825d1.pdf [file d3ra03825d1.pdf]

## Supporting Information

### **Anisotropic crystal orientations dependent mechanical properties and fracture mechanisms in zinc-blende ZnTe nanowires**

A. S. M. Jannatul Islam<sup>a</sup>, Md. Sherajul Islam<sup>a,\*</sup>, Md. Sayed Hasan<sup>a</sup>, Kamal Hosen<sup>b</sup>, Md. Shahadat Akbar<sup>a</sup>, Ashraful G. Bhuiyan<sup>a</sup>, and Jeongwon Park<sup>c,d</sup>

<sup>a</sup>Department of Electrical and Electronic Engineering, Khulna University of Engineering & Technology, Khulna 9203, Bangladesh

<sup>b</sup>Department of Electrical and Computer Engineering, University of Minnesota Twin Cities, Minneapolis, MN 55455, USA

<sup>c</sup>Department of Electrical and Biomedical Engineering, University of Nevada, Reno, NV 89557, USA

<sup>d</sup>School of Electrical Engineering and Computer Science, University of Ottawa, Ottawa, ON K1N 6N5, Canada

**\*Corresponding author. E-mail: [sheraj\\_kuet@eee.kuet.ac.bd](mailto:sheraj_kuet@eee.kuet.ac.bd) (Md. Sherajul Islam)**

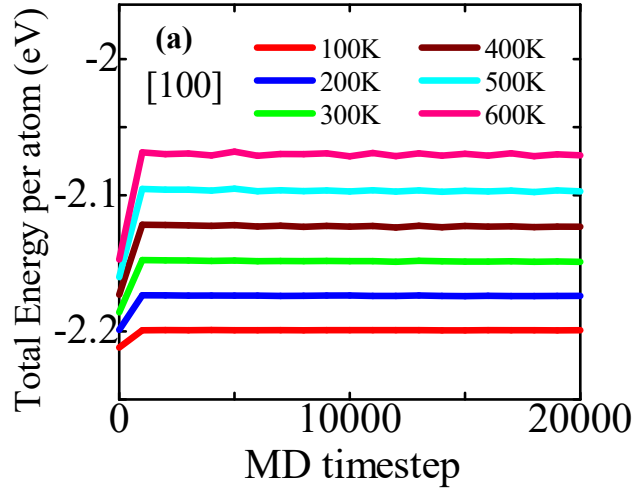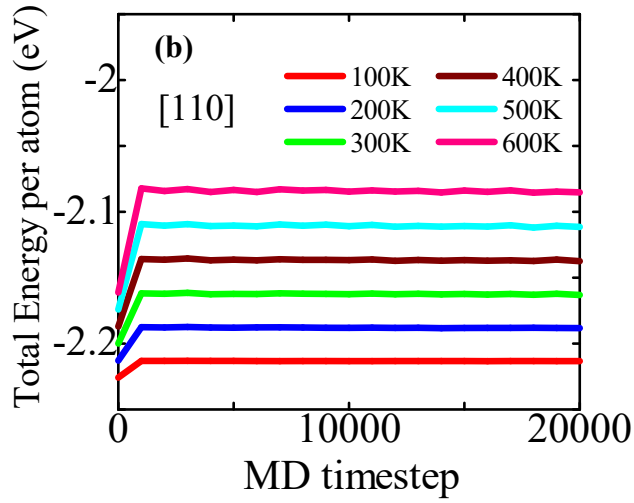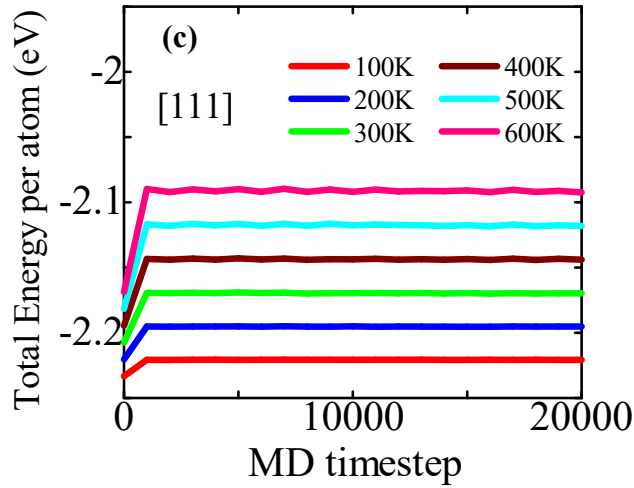

**Fig. S1.** Total energy per atom of (a) [100], (b) [110] and (c) [111]-oriented 18.25 nm<sup>2</sup> ZB ZnTe NW for different temperatures.

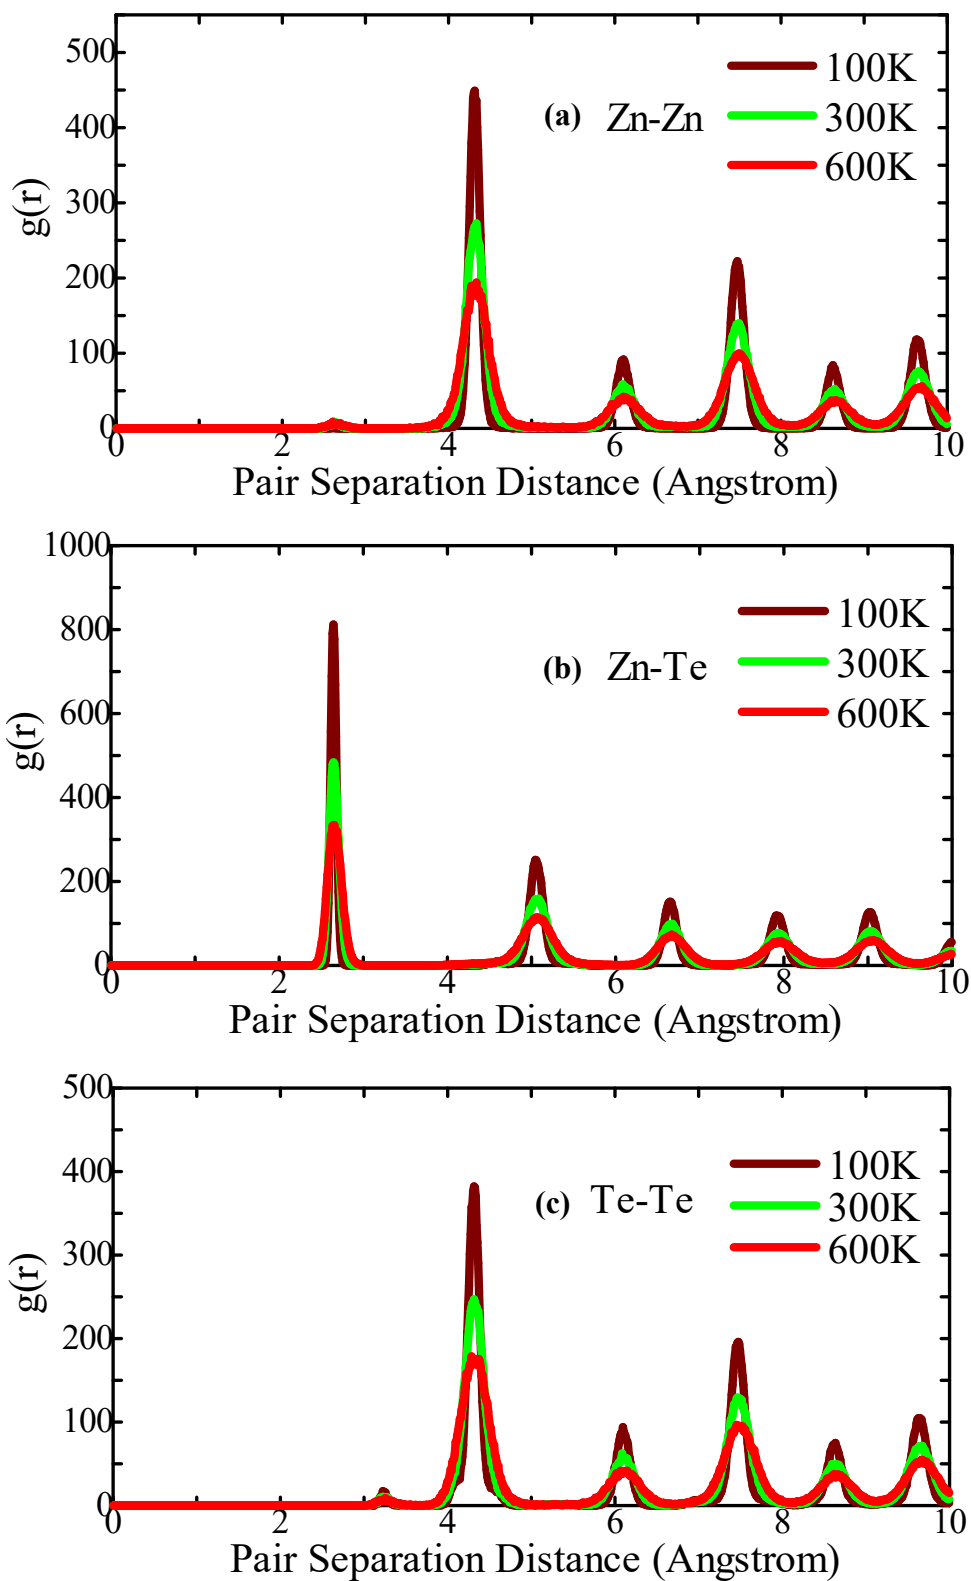

**Fig. S2.** The Radial distribution function (RDF),  $g(r)$  of (a) Zn-Zn (b) Zn-Te and (c) Te-Te pairs of ZnTe NW at three different temperatures.

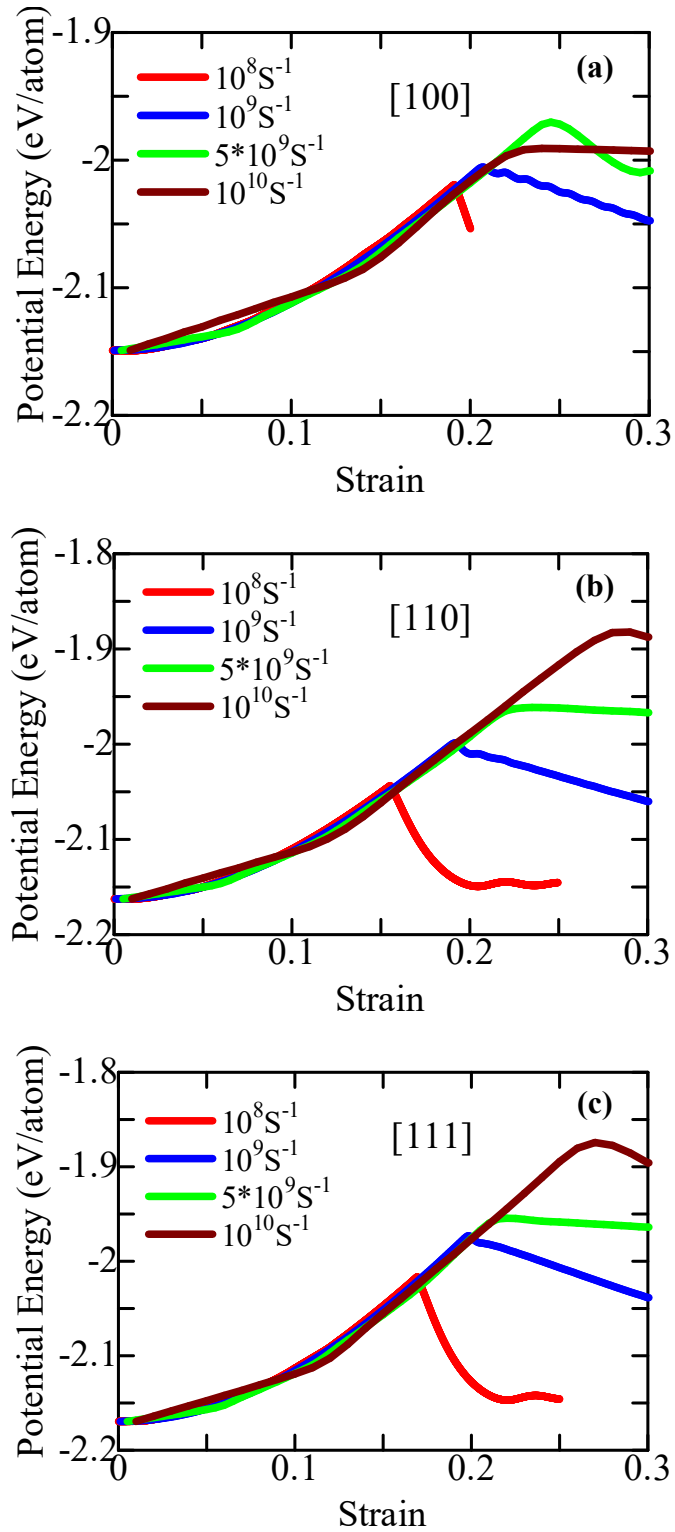

**Fig. S3.** The potential energy per atom curves for (a) [100], (b) [110], and (c) [111]-directed ZB ZnTe NWs at 300 K.
